# Supplementary material for: Sex specific function of epithelial STAT3 signaling in pathogenesis of K-ras mutant lung cancer
Source: PubMed Central journal article supplement (PMC6214980; doi:10.1038/s41467-018-07042-y), 2018-11-02
Supplement: 41467_2018_7042_MOESM1_ESM.pdf [file 41467_2018_7042_MOESM1_ESM.pdf]

# Sex Specific Function of Epithelial STAT3 Signaling in Pathogenesis of *K-ras* Mutant Lung Cancer

Caetano MS and et al.

## SUPPLEMENTARY INFORMATION

### SUPPLEMENTARY FIGURES

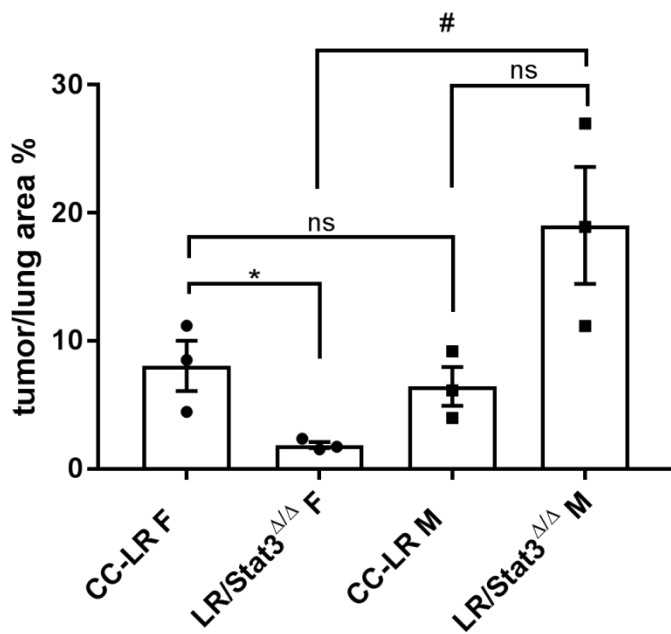

**Supplementary Figure 1. Epithelial *Stat3* deletion induces sex-associated discrepancies in the percentage of lung occupied by the tumor.** Tumor area in the lungs of female (n = 3) and male (n = 3) CC-LR and LR/*Stat3* $\Delta/\Delta$  mice at the age of 14 weeks (Data represent means  $\pm$  standard error of mean (SEM); ns, non-significant; #  $P < 0.05$ ; \*  $P < 0.05$ , using two-tailed t-test).

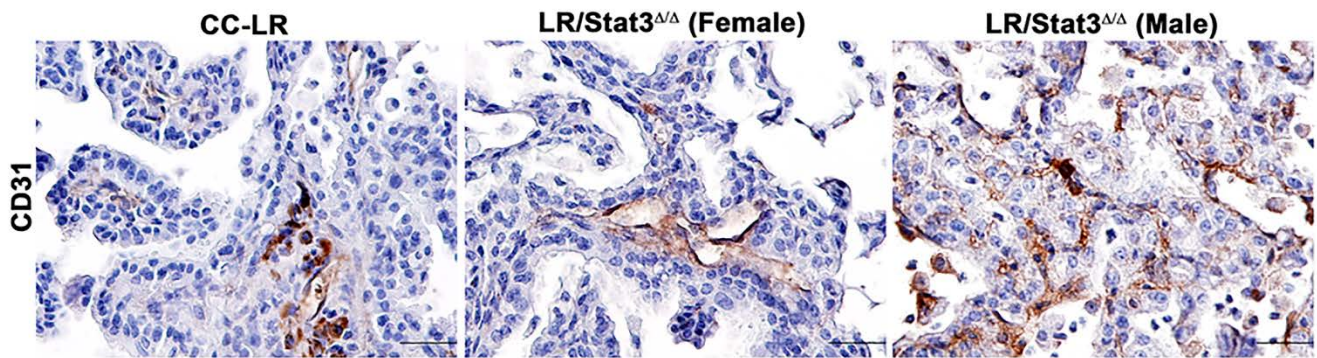

**Supplementary Figure 2. Epithelial *Stat3* deletion induces sex-associated discrepancies in CD31 expression.** Representative photomicrographs of lung tumors stained for CD31 in CC-LR (left panel) and LR/*Stat3*<sup>ΔΔ</sup> female (middle panel) and male (right panel) mice at the age of 14 weeks (n = 3) (20X magnification; Scale bar 100μm).

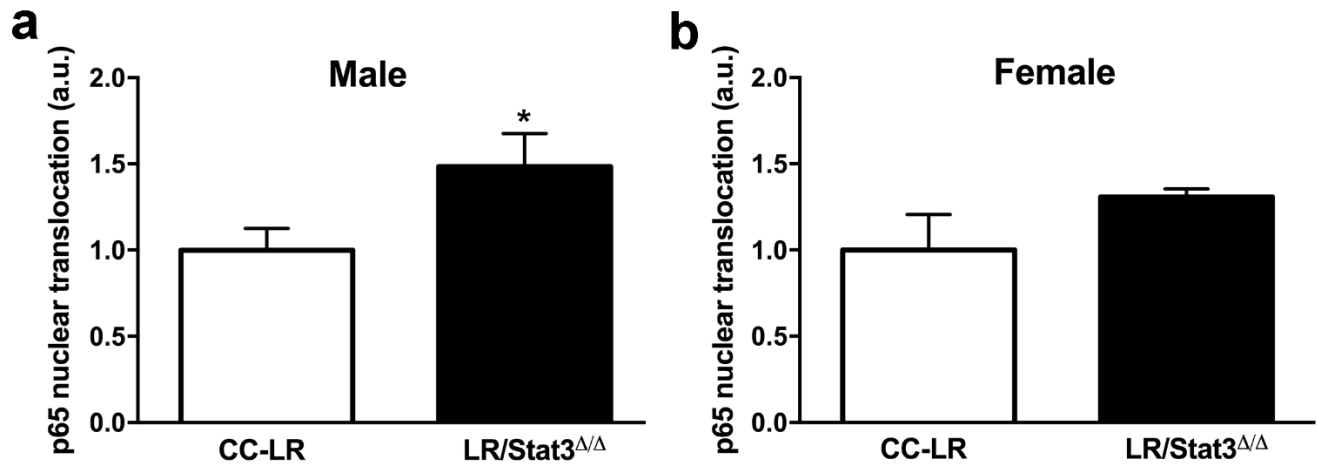

**Supplementary Figure 3. NF- $\kappa$ B activation is increased in male, but not female, LR/Stat3<sup>Δ/Δ</sup> mice.**

NF- $\kappa$ B (P65) DNA binding activity in 14 weeks old male (n = 4) (**a**) and female (n = 4) (**b**) CC-LR and LR/Stat3<sup>Δ/Δ</sup> mice (\**P* < 0.05, using two-tailed t-test, experimental replicate # 2).

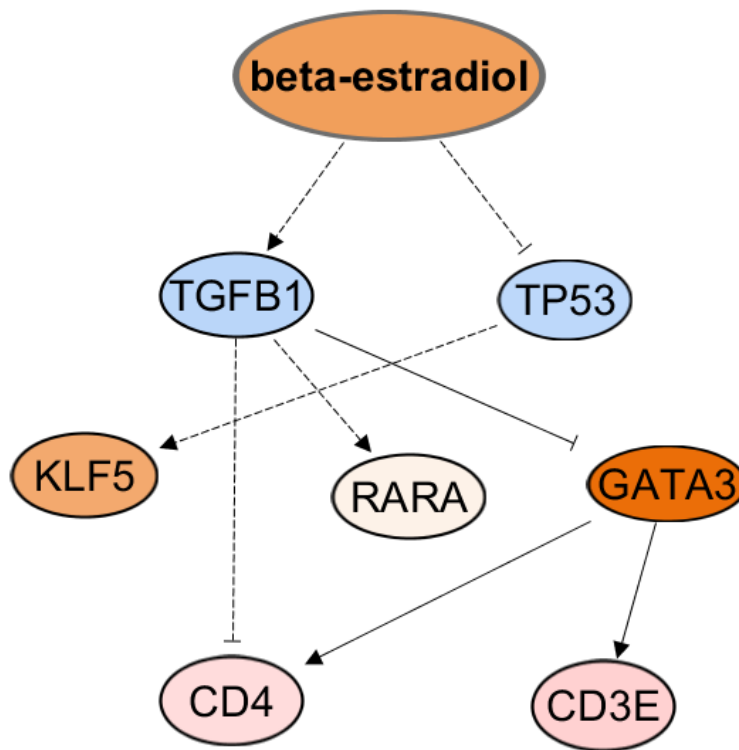

**Supplementary Figure 4. Predicted activation of beta-estradiol signaling in female LR/*Stat3*<sup>Δ/Δ</sup> mice compared to their CC-LR female counterparts.** Differentially expressed transcripts were topologically organized as functional gene-gene interaction networks using IPA as described in the Methods section. The gene-gene interaction networks depict significantly predicted activation of beta-estradiol signaling (indicated by the orange color) and associated gene nodes in *Stat3*-deleted females compared with their female CC-LR counterparts (orange, predicted activated molecular function; blue, predicted inhibited molecular function; red, up-regulated expression in LR/*Stat3*<sup>Δ/Δ</sup> female mice).

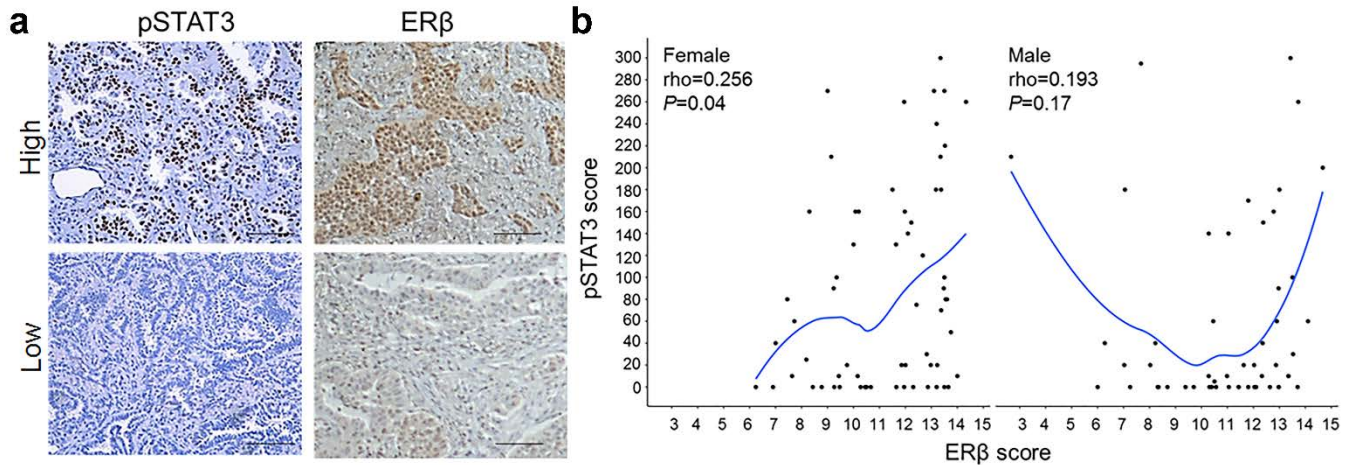

**Supplementary Figure 5. Phosphorylated STAT3 levels are significantly correlated with ERβ**

**protein expression in female lung adenocarcinomas. a.** Tissue microarrays comprised of formalin-fixed paraffin embedded specimens of 118 LUADs (65 females and 53 males) were evaluated immunohistochemically for protein expression of phosphorylated forms of STAT3 (pSTAT3) and ERβ as described in the Methods section (10X; Scale bar 100μm). Percentage of tumor cells with positive pSTAT3 and ERβ expression along with the intensity of expression was quantified as described in the Methods section. **b.** Correlation between pSTAT3 and ERβ expression was statistically evaluated using Spearman correlation; blue color indicates best fit lines.

## SUPPLEMENTARY TABLES

**Supplementary Table 1. Number of reads sequenced**

| <b>Mouse</b> | <b>Genotype</b>                 | <b>Gender</b> | <b>Reads</b> |
|--------------|---------------------------------|---------------|--------------|
| CCLR_F1      | CC-LR                           | Female        | 42091688     |
| CCLR_F2      | CC-LR                           | Female        | 31998551     |
| CCLR_F3      | CC-LR                           | Female        | 37142304     |
| CCLR_M1      | CC-LR                           | Male          | 36088914     |
| CCLR_M2      | CC-LR                           | Male          | 39675884     |
| CCLR_M3      | CC-LR                           | Male          | 38198996     |
| LRDD_F1      | LR/ <i>Stat3</i> <sup>Δ/Δ</sup> | Female        | 53125063     |
| LRDD_F2      | LR/ <i>Stat3</i> <sup>Δ/Δ</sup> | Female        | 46495181     |
| LRDD_F3      | LR/ <i>Stat3</i> <sup>Δ/Δ</sup> | Female        | 35335199     |
| LRDD_M1      | LR/ <i>Stat3</i> <sup>Δ/Δ</sup> | Male          | 42559599     |
| LRDD_M2      | LR/ <i>Stat3</i> <sup>Δ/Δ</sup> | Male          | 45994853     |
| LRDD_M3      | LR/ <i>Stat3</i> <sup>Δ/Δ</sup> | Male          | 49724730     |

CC-LR: *K-ras* mutant-induced mice; LR/*Stat3*<sup>Δ/Δ</sup>: CC-LR mice with epithelial *Stat3* deletion

**Supplementary Table 2. Pathways modulated differently following epithelial *Stat3* deletion in lungs of *Kras* mutant-induced female and male mice.**

| <b>Canonical pathways</b>                           | <b>P-value</b> |
|-----------------------------------------------------|----------------|
| T Cell Receptor Signaling                           | 0.000004       |
| Primary Immunodeficiency Signaling                  | 0.000006       |
| Calcium-induced T Lymphocyte Apoptosis              | 0.000039       |
| Phospholipase C Signaling                           | 0.000046       |
| Role of NFAT in Regulation of the Immune Response   | 0.000078       |
| CD28 Signaling in T Helper Cells                    | 0.000112       |
| iCOS-iCOSL Signaling in T Helper Cells              | 0.000372       |
| Acute Myeloid Leukemia Signaling                    | 0.002089       |
| Gαq Signaling                                       | 0.002399       |
| PI3K Signaling in B Lymphocytes                     | 0.002692       |
| CCR5 Signaling in Macrophages                       | 0.003311       |
| Maturity Onset Diabetes of Young (MODY) Signaling   | 0.003311       |
| GM-CSF Signaling                                    | 0.004169       |
| Antiproliferative Role of Somatostatin Receptor 2   | 0.004677       |
| Telomerase Signaling                                | 0.005623       |
| Nitric Oxide Signaling in the Cardiovascular System | 0.006166       |
| HGF Signaling                                       | 0.006607       |
| NF-κB Activation by Viruses                         | 0.008318       |
| α-Adrenergic Signaling                              | 0.008710       |
| Natural Killer Cell Signaling                       | 0.008913       |
| Breast Cancer Regulation by Stathmin1               | 0.009772       |
| CXCR4 Signaling                                     | 0.010471       |
| Aldosterone Signaling in Epithelial Cells           | 0.010715       |
| PKCθ Signaling in T Lymphocytes                     | 0.011749       |
| B Cell Development                                  | 0.012023       |
| Tec Kinase Signaling                                | 0.012303       |
| p70S6K Signaling                                    | 0.012303       |
| Endometrial Cancer Signaling                        | 0.013804       |
| L-cysteine Degradation II                           | 0.014454       |
| CTLA4 Signaling in Cytotoxic T Lymphocytes          | 0.014791       |
| B Cell Receptor Signaling                           | 0.018621       |
| Thyroid Cancer Signaling                            | 0.019953       |
| Glioma Signaling                                    | 0.022387       |
| NRF2-mediated Oxidative Stress Response             | 0.022909       |
| Neuropathic Pain Signaling In Dorsal Horn Neurons   | 0.025119       |
| ERK/MAPK Signaling                                  | 0.026303       |
| mTOR Signaling                                      | 0.026303       |
| Valine Degradation I                                | 0.027542       |

|                                                                      |          |
|----------------------------------------------------------------------|----------|
| Protein Kinase A Signaling                                           | 0.027542 |
| Regulation of IL-2 Expression in Activated and Anergic T Lymphocytes | 0.028184 |
| Cysteine Biosynthesis/Homocysteine Degradation                       | 0.028840 |
| GDP-L-fucose Biosynthesis I (from GDP-D-mannose)                     | 0.028840 |
| Thrombin Signaling                                                   | 0.028840 |
| GADD45 Signaling                                                     | 0.030200 |
| Hematopoiesis from Pluripotent Stem Cells                            | 0.030903 |
| fMLP Signaling in Neutrophils                                        | 0.031623 |
| Cell Cycle: G2/M DNA Damage Checkpoint Regulation                    | 0.033884 |
| Altered T Cell and B Cell Signaling in Rheumatoid Arthritis          | 0.038905 |
| OX40 Signaling Pathway                                               | 0.040738 |
| CCR3 Signaling in Eosinophils                                        | 0.040738 |
| Cellular Effects of Sildenafil (Viagra)                              | 0.040738 |
| Reelin Signaling in Neurons                                          | 0.044668 |
| Melanoma Signaling                                                   | 0.045709 |
| Systemic Lupus Erythematosus Signaling                               | 0.046774 |
| Estrogen-mediated S-phase Entry                                      | 0.046774 |
| Prostate Cancer Signaling                                            | 0.047863 |

---



**Supplementary Table 3. Upstream regulators and gene sets predicted to be activated differently following epithelial *Stat3* deletion in lungs of *Kras* mutant-induced female and male mice.**

| Upstream regulators                          | Activation z-score |           |
|----------------------------------------------|--------------------|-----------|
|                                              | Female mice        | Male mice |
| HDAC1                                        | 2.59               | -2.59     |
| TCR                                          | 2.59               | -1.98     |
| HDAC2                                        | 2.57               | -2.57     |
| calcitriol                                   | 2.40               | -2.40     |
| SOX11                                        | 2.22               | -2.22     |
| MAP4K4                                       | 2.22               | -2.22     |
| BCL6                                         | 2.21               | -2.21     |
| miR-34a-5p (and other miRNAs w/seed GGCAGUG) | 2.21               | -2.21     |
| GATA3                                        | 2.17               | -2.17     |
| GnRH analog                                  | 2.11               | -2.11     |
| 2-amino-5-phosphonovaleric acid              | 1.98               | -1.11     |
| Ifnar                                        | 1.95               | -1.95     |
| Rock                                         | 1.73               | -1.73     |
| tretinoin                                    | 1.67               | -2.55     |
| IL15                                         | 1.55               | -1.55     |
| IL7                                          | 1.38               | -1.38     |
| ETS1                                         | 1.34               | -1.34     |
| miR-124-3p (and other miRNAs w/seed AAGGCAC) | 1.30               | -1.30     |
| sphingosine-1-phosphate                      | 1.26               | -1.26     |
| miR-27a-3p (and other miRNAs w/seed UCACAGU) | 1.25               | -1.25     |
| SRF                                          | 1.23               | -1.46     |
| miR-17-5p (and other miRNAs w/seed AAAGUGC)  | 1.16               | -1.16     |
| let-7                                        | 1.10               | -1.10     |
| MIR17HG                                      | 1.07               | -1.07     |
| ATF3                                         | 1.07               | -1.07     |
| TCF3                                         | 1.04               | -1.04     |
| bexarotene                                   | 1.00               | -1.34     |
| ERBB3                                        | 1.00               | -1.00     |
| MKNK1                                        | 1.00               | -1.00     |
| NFATC2                                       | 1.00               | -1.00     |
| PRKAA1                                       | 1.00               | -1.00     |
| BNIP3L                                       | 1.00               | -1.00     |
| GH1                                          | 1.00               | -1.00     |
| mir-223                                      | -1.00              | 1.34      |
| WT1                                          | -1.00              | 1.00      |
| IKZF1                                        | -1.03              | 1.03      |
| PDGF BB                                      | -1.04              | 1.81      |

|                           |       |      |
|---------------------------|-------|------|
| CBX5                      | -1.07 | 1.07 |
| GLI2                      | -1.07 | 1.07 |
| FOXM1                     | -1.28 | 1.28 |
| CCND1                     | -1.41 | 1.41 |
| CREB1                     | -1.50 | 2.02 |
| EZH2                      | -1.51 | 1.51 |
| nocodazole                | -1.65 | 1.65 |
| PKD1                      | -1.71 | 1.00 |
| mir-21                    | -1.72 | 1.72 |
| troglitazone              | -1.74 | 1.74 |
| valproic acid             | -1.75 | 1.09 |
| RXRA                      | -1.87 | 1.87 |
| clofibrate                | -1.93 | 1.93 |
| ATF4                      | -1.94 | 1.94 |
| IGF1R                     | -1.95 | 1.95 |
| COMMD3-BMI1               | -2.00 | 2.00 |
| geldanamycin              | -2.00 | 1.34 |
| phorbol myristate acetate | -2.34 | 2.97 |
| benzo(a)pyrene            | -2.41 | 1.00 |

---

**Supplementary Table 4. List of primers used to analyze target immune genes by real-time PCR.**

| <b>Gene</b>  | <b>Forward</b>                | <b>Reverse</b>              |
|--------------|-------------------------------|-----------------------------|
| <i>Actin</i> | 5'GGCTGTATTCCCCTCCATCG3'      | 5'CCAGTTGGTAACAATGCCATGT3'  |
| <i>Cd45</i>  | 5'ACCACCAGGTGAATGTCAATTT3'    | 5'CTTGCTTTCCTTCGGTTCCTT3'   |
| <i>Arg1</i>  | 5'TTTTTCCAGCAGACCAGCTT3'      | 5'AGAGATTATCGGAGCGCCTT3'    |
| <i>Il6</i>   | 5'CTGATGCTGGTGACAACCAC3'      | 5'CAGACTTGCCATTGCACAAC3'    |
| <i>Tnfa</i>  | 5'GAACTGGCAGAGAAGAGGCAT3'     | 5'AGGGTCTGGGCCATAGAACT3'    |
| <i>Ido</i>   | 5'TGGCGTATGTGTGGAACCG3'       | 5'CTCGCAGTAGGGAACAGCAA3'    |
| <i>Il17</i>  | 5'CTCCAGAAGGCCCTCAGACTAC3'    | 5'GGGTCTTCATTGCGGTGG3'      |
| <i>Tgfb</i>  | 5'CTCCCGTGGCTTCTAGTGC3'       | 5'GCCTTAGTTTGGACAGGATCTG3'  |
| <i>Ifng</i>  | 5'GATGCATTCATGAGTATTGCCAAGT3' | 5'GTGGACCACTCGGATGAGCTC3'   |
| <i>Ccl2</i>  | 5'TTAAAAACCTGGATCGGAACCAA3'   | 5'GCATTAGCTTCAGATTTACGGGT3' |
| <i>Foxp3</i> | 5'GGCCCTTCTCCAGGACAGA3'       | 5'GCTGATCATGGCTGGGTTGT3'    |
| <i>Tbx21</i> | 5'CAACAACCCCTTTGCCAAAG3'      | 5'TCCCCCAAGCAGTTGACA3'      |
| <i>Gzmb</i>  | 5'CCACTCTCGACCCTACATGG3'      | 5'GGCCCCAAAGTGACATTTATT3'   |
