# Supplementary material for: Sex specific function of epithelial STAT3 signaling in pathogenesis of K-ras mutant lung cancer
Source: PubMed Central journal article supplement (PMC6214980; doi:10.1038/s41467-018-07042-y), 2018-11-02
Supplement: 41467_2018_7042_MOESM5_ESM.pdf [file 41467_2018_7042_MOESM5_ESM.pdf]

## **Description of Additional Supplementary Files**

File Name: Supplementary Data 1

Description: Gene features modulated differently following epithelial Stat3 deletion in lungs of Kras mutant-induced female and male mice.

File Name: Supplementary Data 2

Description: Diseases and biological functions predicted to be modulated differently following epithelial Stat3 deletion in lungs of Kras mutant-induced female and male mice.
